# Supplementary material
Source: Springer Nature journal article supplement (https://www.springermedizin.de/resource/supplementary/12875_2010_488_MOESM1_ESM.pdf/9434716)

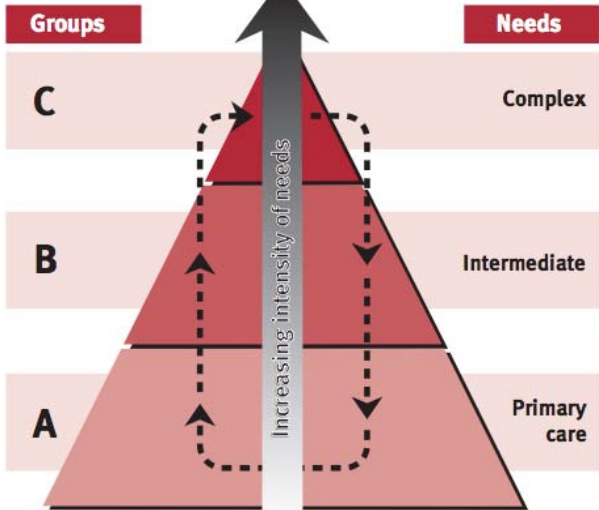

← - - = Patient movement between levels

Supplement: MOESM1 [file 9434716]
